# Supplementary material for: Molecular Dynamics Study of Friction between Ag Nanoparticle and Two-Dimensional Titanium Carbide Ti2C (MXene)
Source: MDPI journal article supplement (doi:10.3390/cryst14030272), 2024-03-12
Supplement: s1 [file s1]

# Supplementary materials

## Molecular Dynamics Study of Friction between Ag Nanoparticle and Two-Dimensional Titanium Carbide Ti2C (MXene)

Vadym Borysiuk <sup>1,2,\*</sup>, Iakov A. Lyashenko <sup>1</sup> and Valentin L. Popov <sup>1,3</sup>

<sup>1</sup> Technische Universität Berlin, Institute of Mechanics, Department of System Dynamics and Friction Physics, 10623 Berlin, Germany; i.lyashenko@tu-berlin.de (I.A.L.); v.popov@tu-berlin.de (V.L.P.)

<sup>2</sup> Sumy State University, Faculty of Electronics and Information Technology, Department of Computerized Control Systems, 40007 Sumy, Ukraine

<sup>3</sup> Samarkand State University, 140104 Samarkand, Uzbekistan

\* Correspondence: v.borysiuk@campus.tu-berlin.de ; Tel.: +49 (0)30 314-75917

### Contents:

#### Description of the interatomic potentials.

##### 1. *Embedded atom method (EAM):*

Within the EAM potential, the total energy of the crystal can be represented as the sum of two terms:

$$U = \frac{1}{2} \sum_{i,j,i \neq j} \varphi(r_{ij}) + \sum_i F(\rho_i), \quad (\text{S.1})$$

where  $\varphi(r_{ij})$  – pair energy between atoms  $i$  and  $j$  separated by distance  $r_{ij}$ ;  $F(\rho_i)$  – embedding energy.

First term in the equation (S.1) has the form:

$$\varphi(r) = \frac{A \cdot \exp \left[ -\alpha \left( \frac{r_{ij}}{r_e} - 1 \right) \right]}{1 + \left( \frac{r_{ij}}{r_e} - \kappa \right)^{20}} - \frac{B \cdot \exp \left[ -\beta \left( \frac{r_{ij}}{r_e} - 1 \right) \right]}{1 + \left( \frac{r_{ij}}{r_e} - \lambda \right)^{20}}, \quad (\text{S.2})$$

where  $r_{ij}$  – distance between atoms  $i$  and  $j$ , and  $r_e, A, B, \alpha, \beta, \kappa, \lambda$  – parameters of the potential.

Electron density  $\rho_i$  is calculated as:

$$\rho_i = \sum_{j,j \neq i} f_j(r_{ij}), \quad (\text{S.3})$$

where electron density function  $f_j(r_{ij})$ :

$$f_j(r_{ij}) = \frac{f_e \cdot \exp\left[-\beta\left(\frac{r_{ij}}{r_e} - 1\right)\right]}{1 + \left(\frac{r_{ij}}{r_e} - \lambda\right)^{20}}, \quad (\text{S.4})$$

where  $f_e$  is a parameter of the potential and all other coefficients are the same as in Eq. (S.2).

Next, the embedding energy  $F(\rho_i)$  is calculated according to one of three following equations, depending on the value of  $\rho_i$ :

$$F(\rho) = \sum_{i=0}^3 F_{ni} \left( \frac{\rho_i}{\rho_n} - 1 \right)^i, \quad \rho_i < \rho_n, \quad \rho_n = 0.85\rho_e, \quad (\text{S.5})$$

$$F(\rho) = \sum_{i=0}^3 F_i \left( \frac{\rho_i}{\rho_e} - 1 \right)^i, \quad \rho_n \leq \rho_i < \rho_0, \quad \rho_0 = 1.15\rho_e, \quad (\text{S.6})$$

$$F(\rho) = F_e \left[ 1 - \ln \left( \frac{\rho_i}{\rho_e} \right)^\eta \right] \cdot \left( \frac{\rho_i}{\rho_e} \right)^\eta, \quad \rho_0 \leq \rho_i. \quad (\text{S.7})$$

where all coefficient, expect  $\rho_i$  are parameters of the potential.

Numerical values of all parameters of the EAM potential needed for calculations of expressions (S.1) – (S.7) for different metals are defined in [36] and for Ti and Ag are listed in the table (T1). Full description of the EAM potential and values of its parameters can be found in original work [36].

*Table T1. EAM parameters for Ti and Ag [36].*

|          | Ti        | Ag        |
|----------|-----------|-----------|
| $r_e$    | 2.933872  | 2.891814  |
| $f_e$    | 1.863200  | 1.106232  |
| $\rho_e$ | 25.565138 | 15.539255 |
| $\alpha$ | 8.775431  | 7.944536  |
| $\beta$  | 4.680230  | 4.237086  |
| $A$      | 0.373601  | 0.266074  |

|           |           |           |
|-----------|-----------|-----------|
| $B$       | 0.570968  | 0.386272  |
| $k$       | 0.5       | 0.425351  |
| $\lambda$ | 1.0       | 0.850703  |
| $F_{n0}$  | -3.203773 | -1.729619 |
| $F_{n1}$  | -0.198262 | -0.221025 |
| $F_{n2}$  | 0.683779  | 0.541558  |
| $F_{n3}$  | -2.321732 | -0.967036 |
| $F_0$     | -3.22     | -1.75     |
| $F_1$     | 0         | 0         |
| $F_2$     | 0.608587  | 0.983967  |
| $F_3$     | -0.750710 | 0.520904  |
| $\eta$    | 0.558572  | 1.149461  |
| $F_e$     | -3.219176 | -1.751274 |

## 2. Two- and three-body potentials:

The potential energy of the pair interaction is described by the Lennard-Jones potential

$$U_{ij} = 4\epsilon_0 \left[ \left( \frac{\sigma}{r_{ij}} \right)^{12} - \left( \frac{\sigma}{r_{ij}} \right)^6 \right], \quad (\text{S.8})$$

where  $r_{ij}$  – distance between atoms  $i$  and  $j$ ;  $\epsilon_0, \sigma$  – parameters of the potential;

The interaction of three atoms  $i, j, k$ , is described by the Axilrod-Teller potential [35]:

$$W_{ijk} = \frac{Z(1 + 3 \cos \theta_i \cos \theta_j \cos \theta_k)}{(r_{ij} r_{ik} r_{jk})^3}, \quad (\text{S.9})$$

where  $r_{ij}, r_{ik}, r_{jk}$  – distances between atoms  $i-j$ ,  $i-k$ , and  $j-k$  respectively;

$Z$  – three-body interaction parameter;

$\theta_i, \theta_j, \theta_k$  – angels of the triangle formed by vectors  $r_{ij}, r_{ik}$  and  $r_{jk}$ .

Numerical values of parameters, used in this study for expressions (S.8) and (S.9) are taken from [30,33,34] and listed in table T2.

*Table T2. LJ and AT parameters used in simulations.*

|              | $\epsilon_0$            | $\sigma$ | $Z$ |
|--------------|-------------------------|----------|-----|
| Ti-C         | 0.6                     | 1.8693   |     |
| C-C          | 0.5                     | 2.7031   |     |
| Ag-substrate | $0.8738 \times 10^{-2}$ | 2.4945   |     |
| Ti-Ti-C      |                         |          | 60  |
| C-C-Ti       |                         |          | 160 |
